# Supplementary material for: Phosphorylation of a malate transporter promotes malate excretion and reduces cadmium uptake in apple
Source: PubMed Central journal article supplement (PMC7475249; doi:10.1093/jxb/eraa121), 2020-03-09
Supplement: eraa121_suppl_supplementary_file_001.pdf [file eraa121_suppl_supplementary_file_001.pdf]

**Figure S1.** Cd<sup>2+</sup> induced the expression of *MdSOS2L1*.

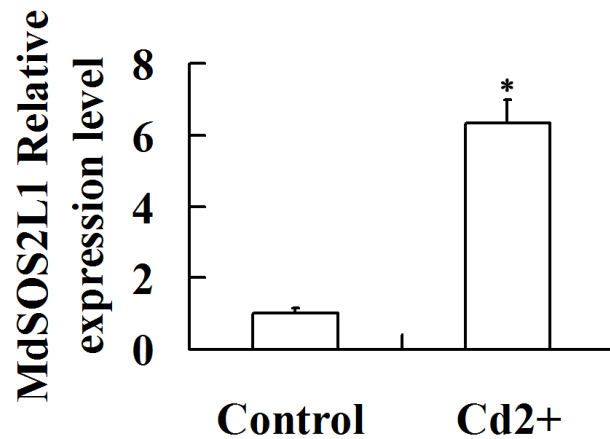

**Figure S2.** Overexpression *MdSOS2L1* transgenic plants improved Cd<sup>2+</sup> resistance in *A. thaliana*. (A) The phenotype of plant lines Col, *sos2-2*, *MdSOS2L1-1*, 2 under CdCl<sub>2</sub> treatment. (B) root length; (C) the chlorophyll content; (D) the Cd<sup>2+</sup> content

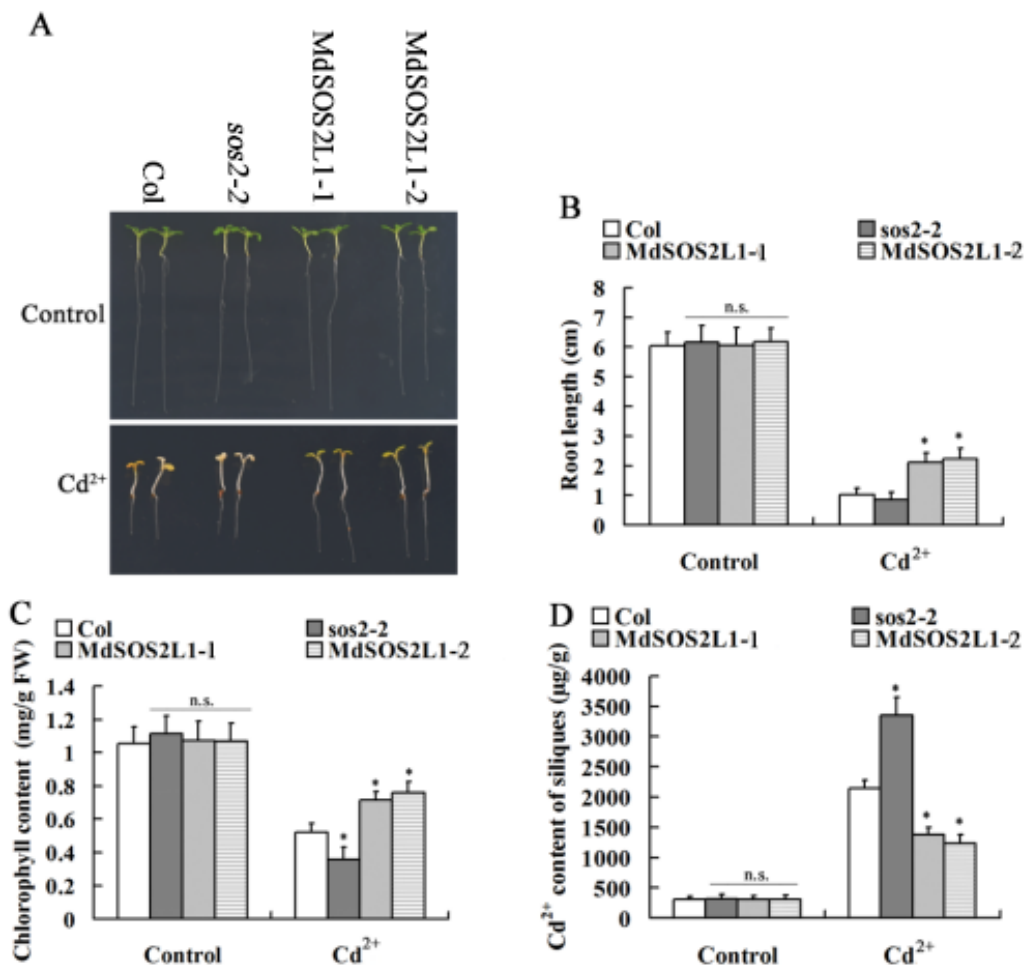

**Figure S3.** Overexpression *MdSOS2L1* transgenic plants improved  $\text{Cd}^{2+}$  resistance in tomato. (A) The phenotype of plant lines WT, *MdSOS2L1-1* and *MdSOS2L1-4* under  $\text{CdCl}_2$  treatment. (B) plant height; (C) the  $\text{Cd}^{2+}$  content of fruit.

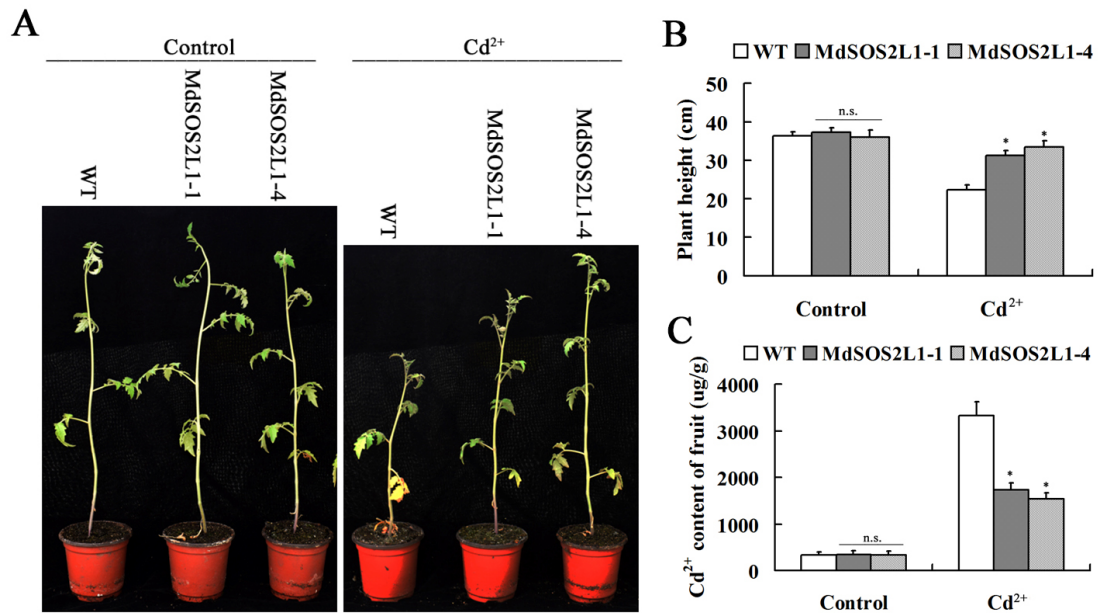

**Figure S4.** The phylogenetic tree of *MdALMT14* and *AtALMTs*.

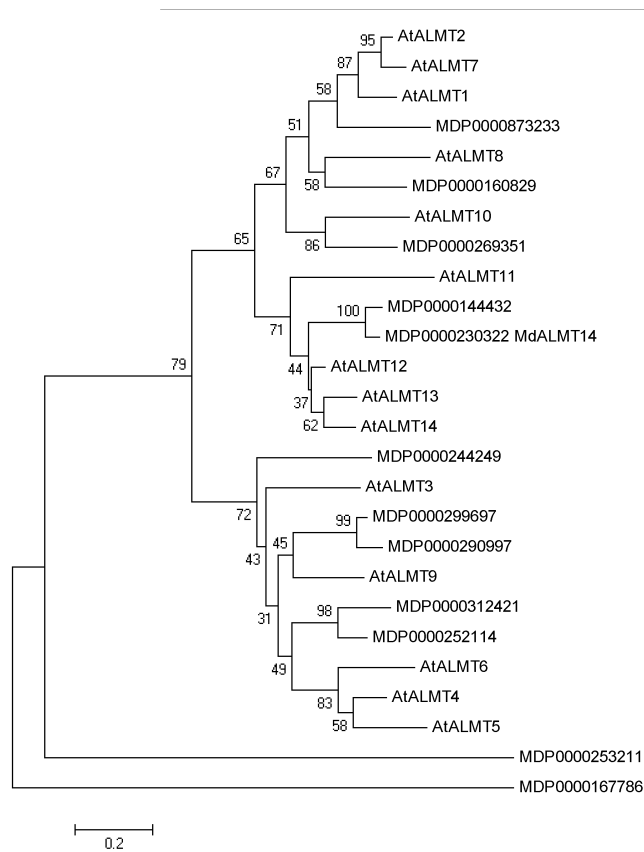

**Figure S5.** The transmembrane domains of MdALMT14.

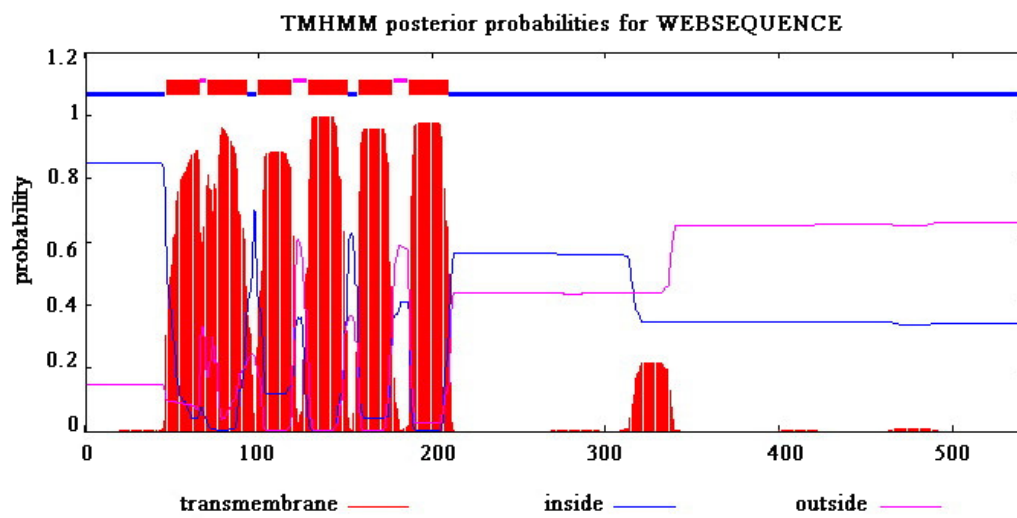

**Figure S6.** The expression of MdALMT14 was detected in transgenic plants.

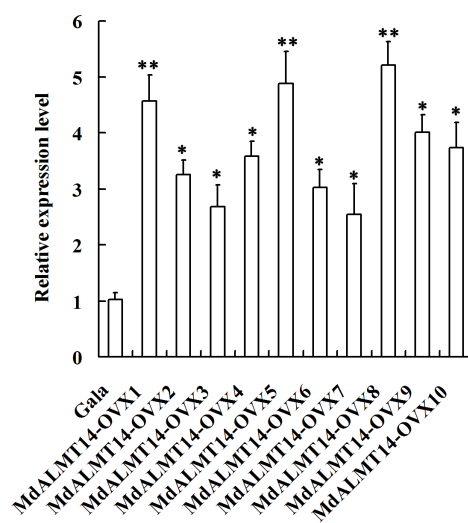

**Figure S7.** Collision-induced dissociation mass spectrum showed the phosphorylation site was serine (S) at residue 358 (S358) of the MdALMT14 protein.

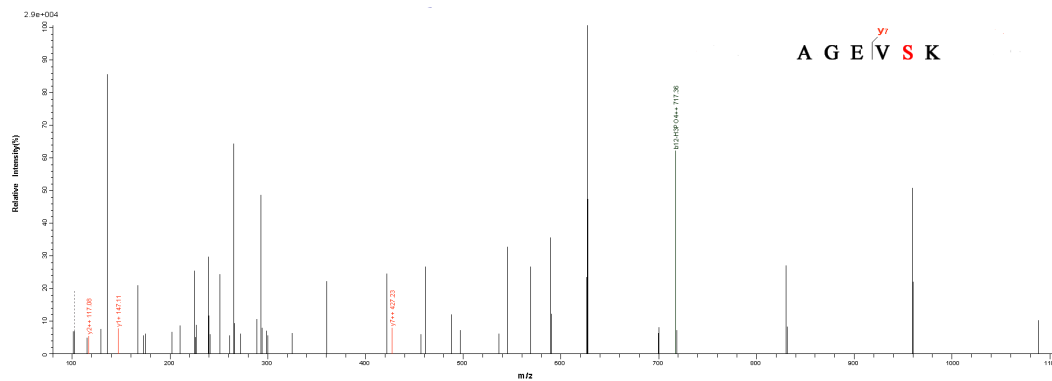

**Figure S8.** RFP signal was observed in co-expressed plants  $\text{MdSOS2L1-OVX1}^{\text{shoot}}/(\text{MdSOS2L1-OVX1+Anti-MdALMT14})^{\text{root}}$  and  $\text{MdSOS2L1-OVX2}^{\text{shoot}}/(\text{MdSOS2L1-OVX2+Anti-MdALMT14})^{\text{root}}$ .

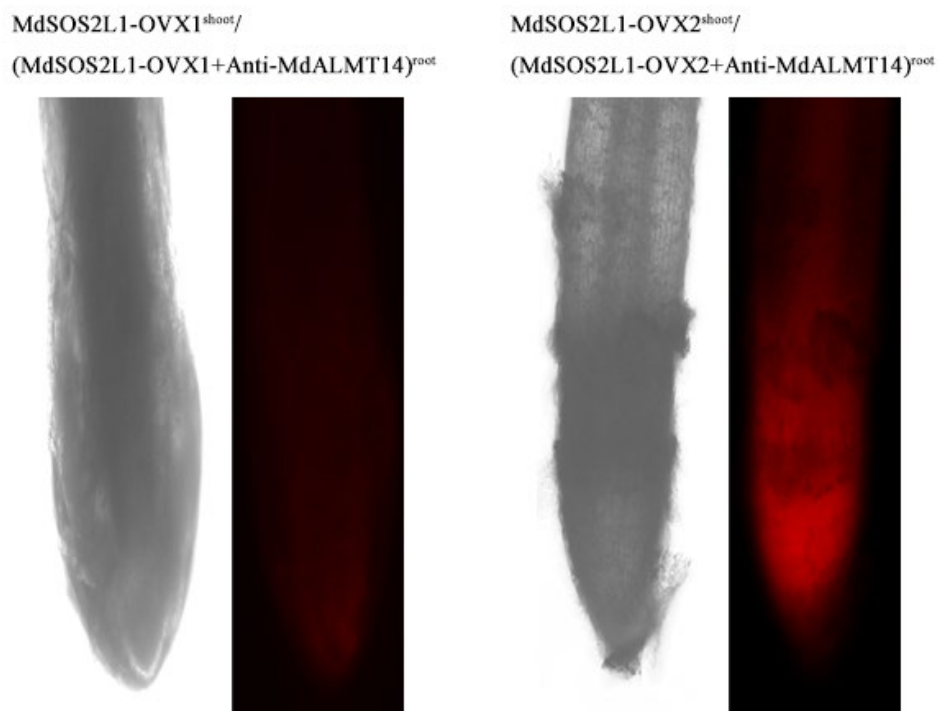

**Table S1.** Primers used in this study.

| Primer              | Sequence (5'to 3')           |
|---------------------|------------------------------|
| MdALMT14-F          | GTTTCCCAAAGTTCATGCAGG        |
| MdALMT14-R          | CTTGCTTGTACAGATTAAGGC        |
| qMdALMT14-F         | GCTGACTCTTACCCCTTGTG         |
| qMdALMT14-R         | CTGGGAGTTTTTGTGTAGGGTAAT     |
| ALMT14-Myc-F        | AATGGACATGGGCAAGGAT          |
| ALMT14-Myc-R        | GTCGACTTAATCAGCTCCATG        |
| ALMT14-GST-F        | GAATTCATGGACATGGGCAAGG       |
| ALMT14-GST-R        | GTCGACTTAATCAGCTCCATGGG      |
| 18S -F              | CACGGGGAGGTAGTGACAA          |
| 18S -R              | CCTCCAATGGATCCTCGTTA         |
| MdALMT14(MSU440)-F  | GTCGACTGAATTCATGGACATGGGCAAG |
| MdALMT14 (MSU440)-R | CCCGGGATCAGCTCCATGGGAAG      |
